# Supplementary material for: Persistent alveolar type 2 dysfunction and lung structural derangement in post-acute COVID-19
Source: bioRxiv or medRxiv preprint supplement (doi:10.1101/2022.11.28.22282811), 2022-11-29

Supplementary Figure 06

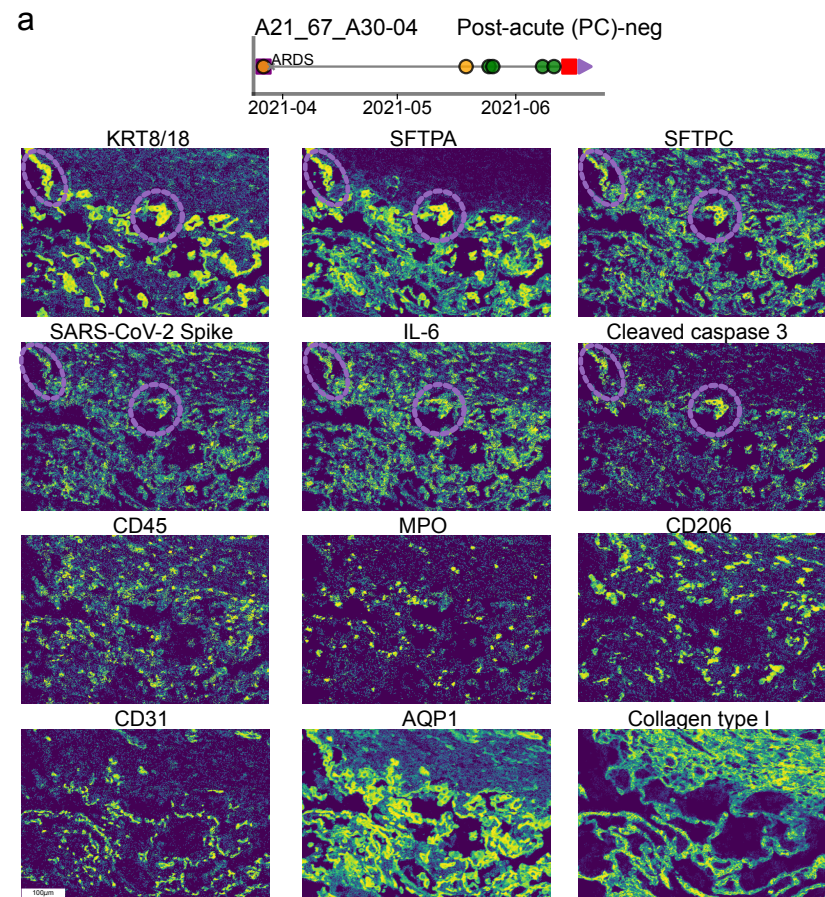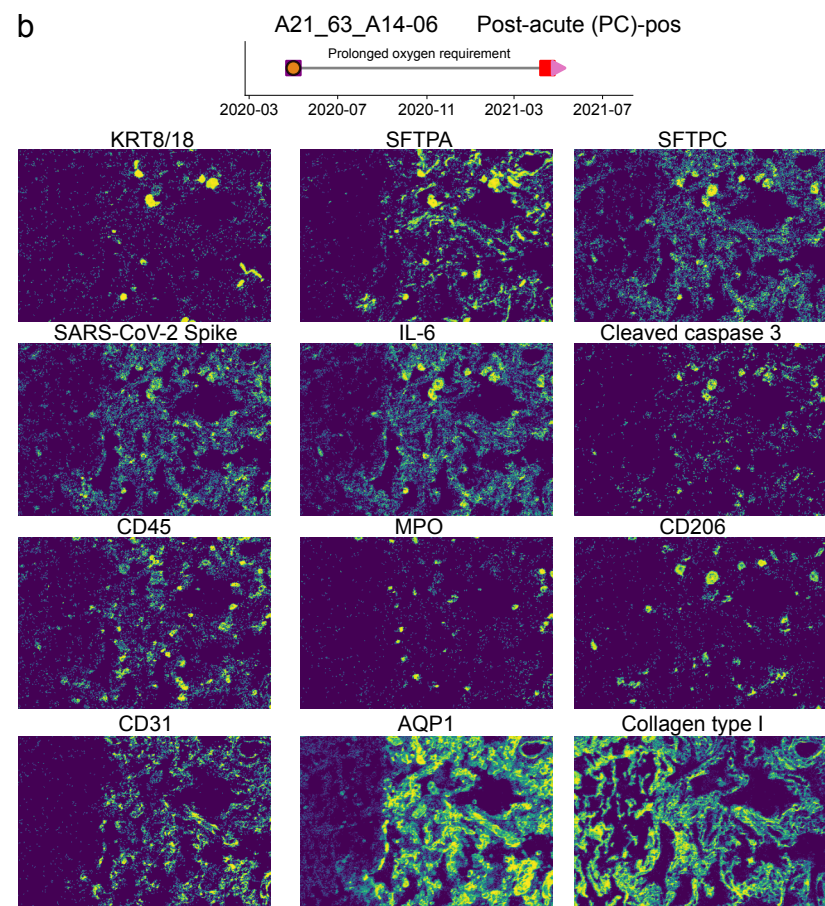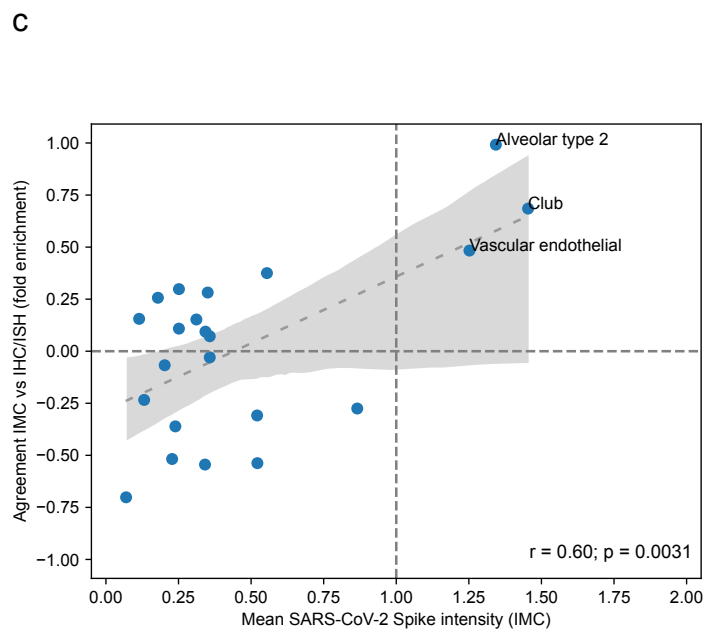

Supplement: Supplementary file [file media-6.pdf]
